# Supplementary material for: Individual Differences in Thresholds and Consumer Preferences for Rotundone Added to Red Wine
Source: Nutrients. 2020 Aug 20;12(9):2522. doi: 10.3390/nu12092522 (PMC7551619; doi:10.3390/nu12092522)
Supplement: Supplementary file 1 [file nutrients-12-02522-s001.pdf]

**Table S1.** Participant demographics for Study 1.

| Prompt                                    | Sample ( <i>n</i> = 104*) | Prevalence |
|-------------------------------------------|---------------------------|------------|
| How often do you consume wine?            |                           |            |
| Never                                     | 3                         | 2.88%      |
| A few times a year                        | 15                        | 14.42%     |
| Once a month                              | 13                        | 12.5%      |
| 2–3 times a month                         | 35                        | 33.65%     |
| Once a week                               | 19                        | 18.27%     |
| 2–3 times a week                          | 17                        | 16.35%     |
| 4–6 times a week                          | 1                         | 0.96%      |
| Every day                                 | 1                         | 0.96%      |
| How often do you consume beer?            |                           |            |
| Never                                     | 10                        | 9.61%      |
| A few times a year                        | 14                        | 13.46%     |
| Once a month                              | 10                        | 9.61%      |
| 2–3 times a month                         | 30                        | 28.85%     |
| Once a week                               | 21                        | 20.19%     |
| 2–3 times a week                          | 15                        | 14.42%     |
| 4–6 times a week                          | 4                         | 3.85%      |
| Every day                                 | 0                         | 0%         |
| How often do you consume liquor straight? |                           |            |
| Never                                     | 13                        | 12.26%     |
| A few times a year                        | 41                        | 39.42%     |
| Once a month                              | 18                        | 17.31%     |
| 2–3 times a month                         | 17                        | 16.35%     |
| Once a week                               | 6                         | 5.77%      |
| 2–3 times a week                          | 7                         | 6.73%      |
| 4–6 times a week                          | 2                         | 1.89%      |
| Every day                                 | 0                         | 0%         |
| How often do you consume mixed drinks?    |                           |            |
| Never                                     | 4                         | 3.85%      |
| A few times a year                        | 38                        | 36.54%     |
| Once a month                              | 21                        | 20.19%     |
| 2–3 times a month                         | 26                        | 25%        |
| Once a week                               | 7                         | 6.73%      |
| 2–3 times a week                          | 7                         | 6.73%      |
| 4–6 times a week                          | 0                         | 0%         |
| Every day                                 | 1                         | 0.96%      |

\*5 participants did not provide this information.

**Table S2.** Participant demographics for Study 2.

| Prompt                         | Sample ( <i>n</i> = 85*) | Prevalence |
|--------------------------------|--------------------------|------------|
| How often do you consume wine? |                          |            |
| Never                          | 1                        | 1.18%      |
| A few times a year             | 8                        | 9.42%      |
| Once a month                   | 22                       | 25.88%     |
| 2–3 times a month              | 20                       | 23.53%     |
| Once a week                    | 13                       | 15.29%     |
| 2–3 times a week               | 16                       | 18.82%     |
| 4–6 times a week               | 4                        | 4.71%      |
| Every day                      | 1                        | 1.18%      |

| How often do you consume beer?            |    |        |
|-------------------------------------------|----|--------|
| Never                                     | 9  | 10.59% |
| A few times a year                        | 13 | 15.29% |
| Once a month                              | 11 | 12.94% |
| 2-3 times a month                         | 10 | 11.76% |
| Once a week                               | 20 | 23.53% |
| 2-3 times a week                          | 14 | 16.47% |
| 4-6 times a week                          | 8  | 9.42%  |
| Every day                                 | 0  | 0%     |
| How often do you consume liquor straight? |    |        |
| Never                                     | 11 | 12.94% |
| A few times a year                        | 25 | 29.41% |
| Once a month                              | 16 | 18.82% |
| 2-3 times a month                         | 17 | 20%    |
| Once a week                               | 10 | 11.76% |
| 2-3 times a week                          | 4  | 4.71%  |
| 4-6 times a week                          | 2  | 2.35%  |
| Every day                                 | 0  | 0%     |
| How often do you consume mixed drinks?    |    |        |
| Never                                     | 6  | 7.06%  |
| A few times a year                        | 22 | 25.88% |
| Once a month                              | 16 | 18.82% |
| 2-3 times a month                         | 20 | 23.53% |
| Once a week                               | 13 | 15.29% |
| 2-3 times a week                          | 6  | 7.06%  |
| 4-6 times a week                          | 2  | 2.35%  |
| Every day                                 | 0  | 0%     |

\*1 participant did not provide this information.
